# Supplementary material for: AaABCG40 Enhances Artemisinin Content and Modulates Drought Tolerance in Artemisia annua
Source: PubMed Central journal article supplement (PMC7333515; doi:10.3389/fpls.2020.00950), 2020-06-26
Supplement: DataSheet_1.pdf [file DataSheet_1.pdf]

## Supplementary Information

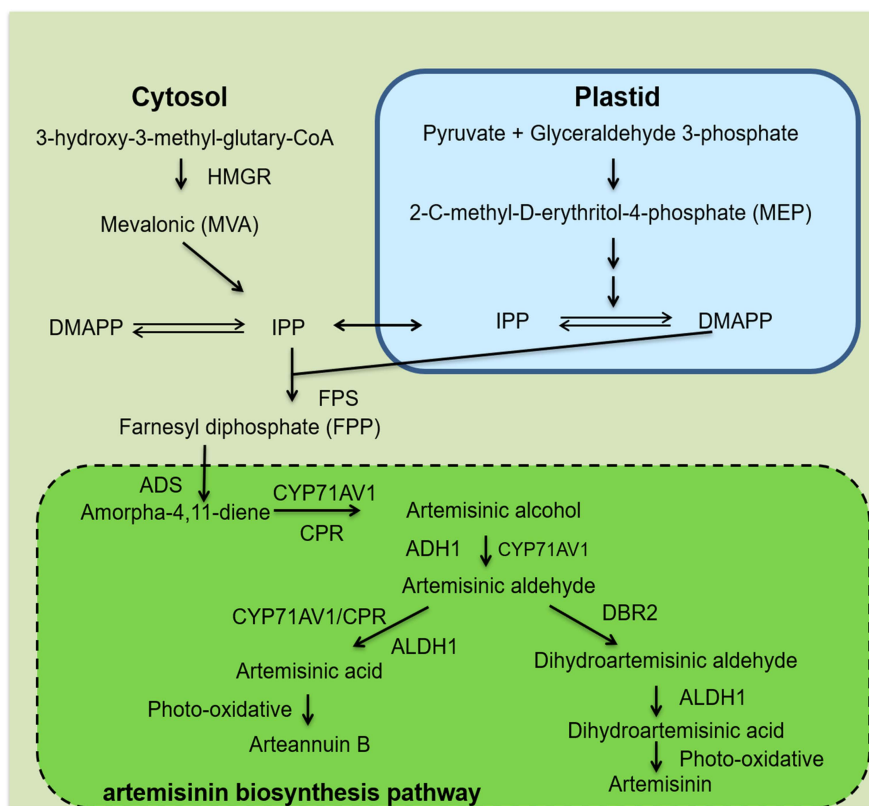

**Figure S1. The artemisinin biosynthetic pathway.** HMGR, 3-hydroxy-3-methylglutaryl-CoA reductase; DXS, 1-deoxyxylulose 5-phosphate synthase; DXR, 1-deoxyxylulose 5-phosphate reductoisomerase; DMAPP, dimethylallyl diphosphate; IPP, isopentenyl diphosphate; FPS, farnesyl diphosphate synthase; ADS, amorpha-4,11-diene synthase; CYP, cytochrome P450; CYP71AV1, cytochrome P450-dependent hydroxylase; CPR, cytochrome P450 oxidoreductase; DBR2, double bond reductase 2; ALDH1, aldehyde dehydrogenase 1; ADH1, alcohol dehydrogenase; CYB5, cytochrome b5 monooxygenase.

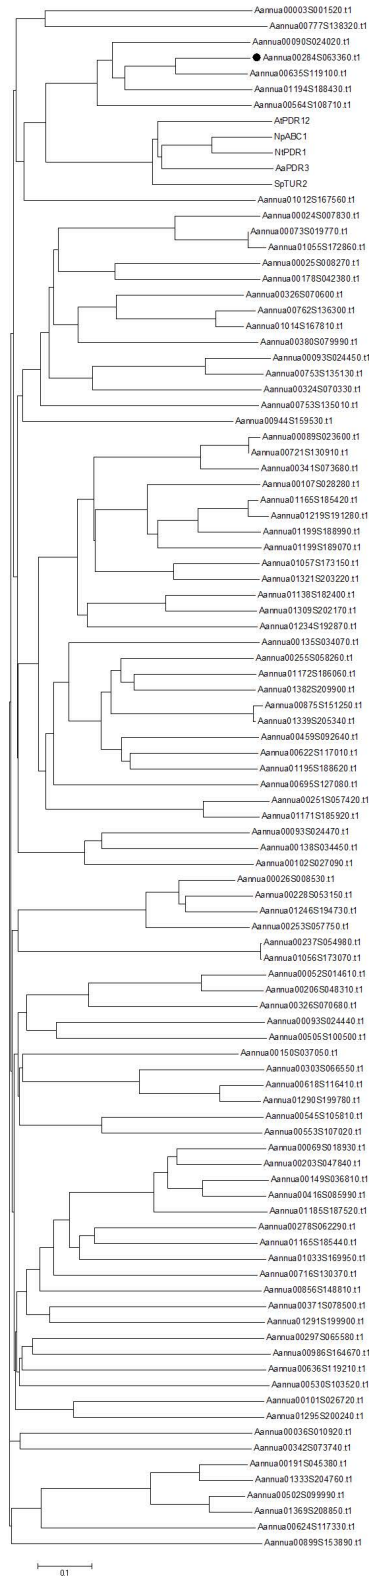

**Figure S2. Phylogenetic tree showing the relationship ABC transporters in *A. annua* compared with AtPDR12 from *Arabidopsis*.** The tree presented here is a neighbor-joining tree based on amino acid sequence alignment. The candidate gene *AaABCG40* is marked by the black circle.

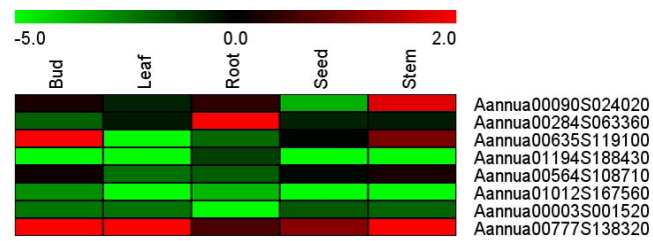

**Figure S3. Hierarchical cluster analysis of 8 PDR transporter genes in *A. annua*.** The color scale at the top represents the value of log-transformed reads per kilobase per million of mapped reads.

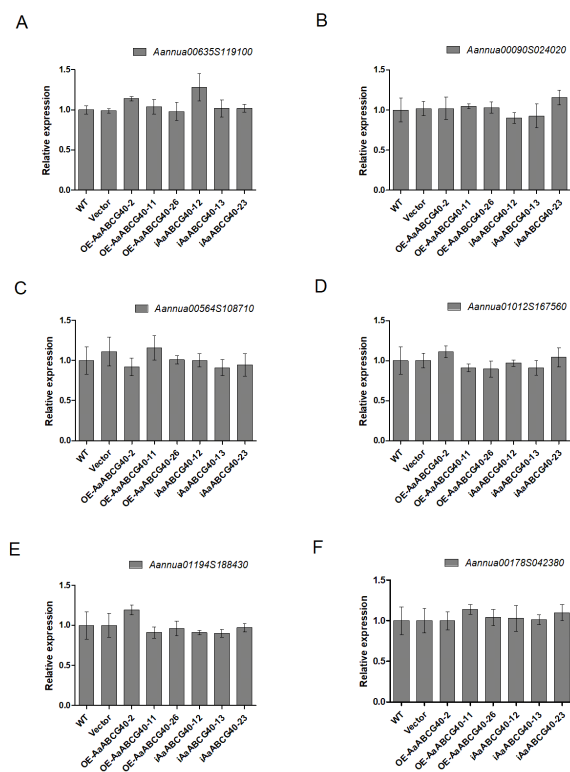

**Figure S4. Comparative analyses of *AaABCG* gene expression in wild type (WT), plants transformed with the empty vector (EV), *AaABCG40*-overexpression and *AaABCG40*-RNAi plants. (A) Relative expression of Aannua00635S119100 in WT, EV and *AaABCG40* transgenic *A. annua* lines. (B) Relative expression of Aannua00090S024020 in WT, EV and *AaABCG40* transgenic *A. annua* lines. (C) Relative expression of Aannua00564S108710 in WT, EV and *AaABCG40* transgenic *A. annua* lines. (D) Relative expression of Aannua01012S167560 in WT, EV and *AaABCG40* transgenic *A. annua* lines. (E) Relative expression of Aannua01194S188430 in WT, EV and *AaABCG40* transgenic *A. annua* lines. (F) Relative expression of Aannua00178S042380 in WT, EV and *AaABCG40* transgenic *A. annua* lines. The error bars represent the means  $\pm$  SD from three biological replicates.**

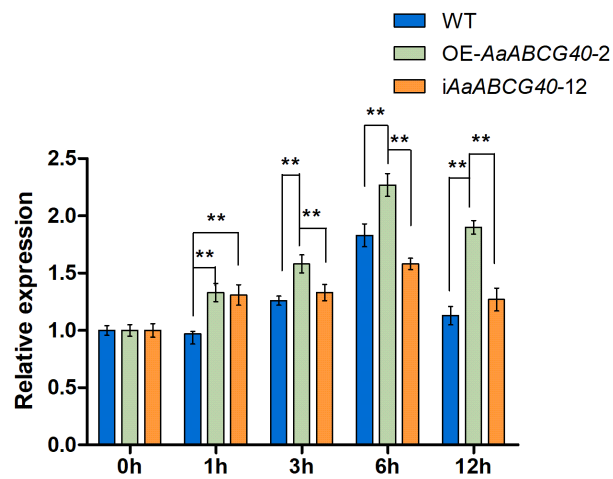

**Figure S5. Relative expression of *AaCYP71AV1* in wild type (WT), OE-*AaABCG40-2* and *AaABCG40*-RNAi-12 plants with the ABA treatment. *ACT1N* was used as internal control. The error bars represent the means  $\pm$  SD from three replicates.  $P < 0.05$ ,  $P < 0.01$ , student's *t*-test.**

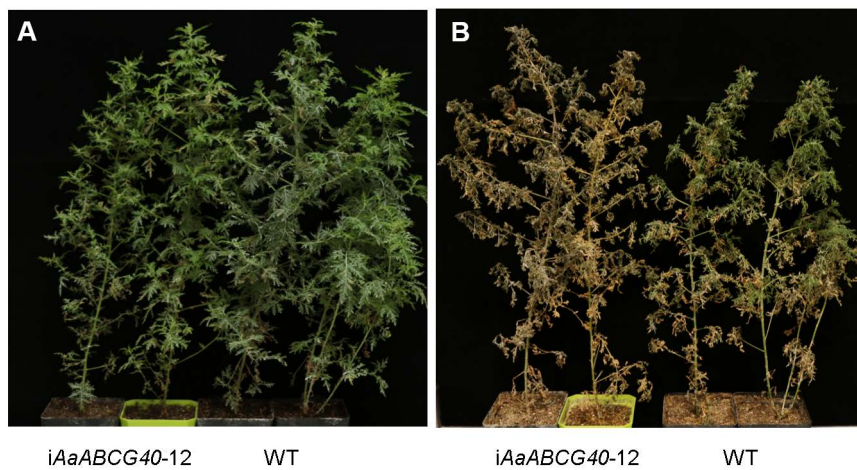

**Figure S6. *AaABCG40*-RNAi transgenic *A. annua* showed worse tolerance under drought stress. (A)** Two-month-old cutting seedlings of *AaABCG40*-RNAi transgenic plants and wild-type *A. annua* plants were cultivated in pots and watered well in the growth chamber under a 16-h light/8-h dark cycle at 25°C for a week. **(B)** Water was withheld for 14 days.

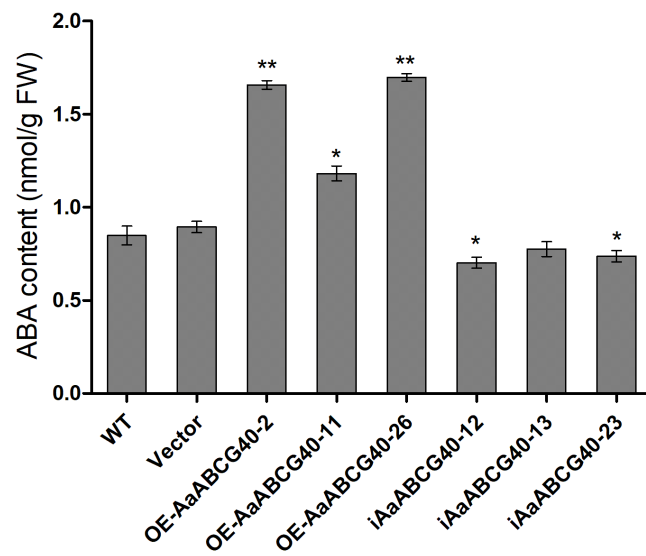

**Figure S7. ABA levels measured in the leaves of wild type (WT), OE-AaABCG40-2 and AaABCG40-RNAi-12 plants.** The error bars represent the means  $\pm$  SD from three replicates.  $P < 0.05$ ,  $P < 0.01$ , student's *t*-test.

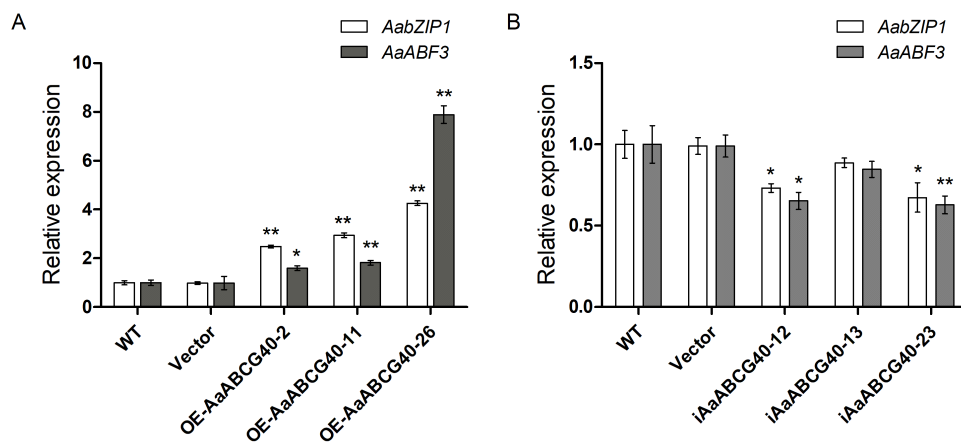

**Figure S8. Relative expression of *AaZIP1* and *AaABF3* in wild type (WT), plants transformed with the empty vector (EV), *AaABCG40*-overexpression and *AaABCG40*-RNAi plants. (A) Relative expression of *AaZIP1* and *AaABF3* in WT, EV and *AaABCG40*-overexpression transgenic *A. annua* lines. (B) Relative expression of *AaZIP1* and *AaABF3* in WT, EV and *AaABCG40*-RNAi transgenic *A. annua* lines. *ACTIN* was used as internal control. The error bars represent the means  $\pm$  SD from three technical replicates.  $P < 0.05$ ,  $P < 0.01$ , student's *t*-test.**



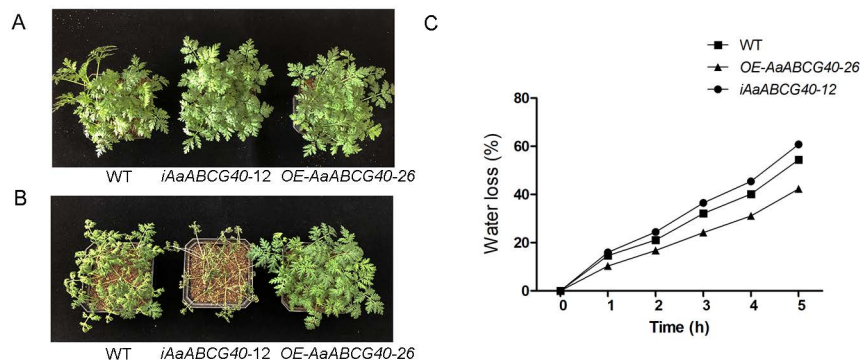

**Figure S9. The next generation of *AaABCG40*-overexpression transgenic *A. annua* showed better tolerance under drought stress.** (A) The seeds of OE-AaABCG40-26 transgenic plant and wild-type *A. annua* plants were cultivated in pots and watered well in the growth chamber under a 16-h light/8-h dark cycle at 25°C for one month. (B) Water was withheld for 20 days. (C) Time course of water loss from the leaves of 4-week-old wild-type and OE-AaABCG40-26 *A. annua* plants. Three independent experiments were performed, and three independent plants were used to calculate. The error bars represent the means  $\pm$  SD from three technical replicates.

**Table S1.** Primers used in this study.

| No. | Primer name              | Use     | Primer sequence 5'-3'                      | Restriction enzyme |
|-----|--------------------------|---------|--------------------------------------------|--------------------|
| 1   | AaABCG40-FP1             | cloning | TGTAACAATGGATGGAAGTACTGGAAT                | -                  |
| 2   | AaABCG40-RP1             | cloning | CGACTGCAATCCAATACCAGTAAGC                  |                    |
| 3   | AaABCG40-FP              | qPCR    | GGGAAACAAACGATTTTATCCAGAGC                 |                    |
| 4   | AaABCG40-RP              | qPCR    | CCAAGGAAAGTAAGAGCCACAGCATA                 |                    |
| 5   | $\beta$ -actin-FP        | qPCR    | CCAGGCTGTTTCTGCTCTGTAT                     |                    |
| 6   | $\beta$ -actin-RP        | qPCR    | CGCTCGGTAAGGATCTTCATCA                     |                    |
| 7   | BamHI-AaABCG40-FP        | cloning | CTCTCTCTCCAACCTGGATCCATGGAAGTACTGGAATA     | <i>BamHI</i>       |
| 8   | AaABCG40-Spel-RP         | cloning | CCCTTGCTCACCATACTAGTTCTTCTGGAAATTAAGGAT    | <i>SpeI</i>        |
| 9   | AaABCG40-RNAi-FP         | cloning | CACCGGTGAACGAGTTCCTTGCC                    |                    |
| 10  | AaABCG40-RNAi-RP         | cloning | CATCGAAGGTAATTGAATGTGGTTC                  |                    |
| 11  | Pro- AaABCG40-FP         | cloning | TTGGTGTGTTTGTTCCTATTTATG                   |                    |
| 12  | Pro- AaABCG40-RP         | cloning | CTTTATCCAGTCAGTTCATCCATTG                  |                    |
| 13  | PstI-ProAaABCG40 -FP     | cloning | TGCACTGCAGTTGGTGTGTTTGTTCCTAT              | <i>PstI</i>        |
| 14  | ProAaABCG40-BamHI-RP     | cloning | CGGGATCCTGTTACAAAAGATCAATTGATC             | <i>BamHI</i>       |
| 15  | AaADS-F                  | qPCR    | GGACTAGTTCAGGCTATG                         |                    |
| 16  | AaADS-R                  | qPCR    | AAGCATGTAATTGACCACC                        |                    |
| 17  | AaCYP71AV1-F             | qPCR    | TCATTTTCTGCTGCTT                           |                    |
| 18  | AaCYP71AV1-R             | qPCR    | CCAGTTTGCCTCAGTA                           |                    |
| 19  | AaDBR2-F                 | qPCR    | ACTGCTGGTGGCTTTCTTA                        |                    |
| 20  | AaDBR2-R                 | qPCR    | ACCCTCGACTTGTTCCTTA                        |                    |
| 21  | AaALDH1-F                | qPCR    | CAGTTTCTGACCCAAATCCAGTTGA                  |                    |
| 22  | AaALDH1-R                | qPCR    | TCGGAGTAGTTGGTCACAT                        |                    |
| 23  | PDR196-AaABCG40-FP       | cloning | AGTGGATCCCCGGGCTGCAGATGGATGGAAGTACTGGAATA  |                    |
| 24  | PDR196-AaABCG40-RP       | cloning | CTTGATATCGAATTCCTGCAGTTATCTTCTGGAAATTAAG   |                    |
| 25  | PDR196-AtPDR12-FP        | cloning | AGTGGATCCCCGGGCTGCAGATGGAGGGAAGTACTGTTTACC |                    |
| 26  | PDR196-AtPDR12-RP        | cloning | GTACCGGGCCCCCTCGAGCTATCGTTTTTGGAAATTGA     |                    |
| 27  | Aannua00178S042380-RT-FP | qPCR    | CTCAACTCCGTGGTCCAACCTCT                    |                    |
| 28  | Aannua00178S042380-RT-RP | qPCR    | TATTGAACCAGAAAATGGACGGCT                   |                    |
| 29  | Aannua00635S119100-RT-FP | qPCR    | TCCCGTGAAGAAAATGACGAAGA                    |                    |

|    |                          |      |                           |  |
|----|--------------------------|------|---------------------------|--|
| 30 | Aannua00635S119100-RT-RP | qPCR | ATCTTCATCAGCGGCATTCACAA   |  |
| 31 | Aannua01194S188430-RT-FP | qPCR | AGGAGCACGAAGCAGAAGCCAAA   |  |
| 32 | Aannua01194S188430-RT-RP | qPCR | TGTAAAGACGCCAGTTTCAATGC   |  |
| 33 | Aannua00090S024020-RT-FP | qPCR | AGGACACAAGATAACGACGAGGA   |  |
| 34 | Aannua00090S024020-RT-RP | qPCR | CAACAAGCGTAAACTCGCCTCCAG  |  |
| 35 | Aannua00564S108710-RT-FP | qPCR | GCTTGGGCACAATGGGTGGGTAT   |  |
| 36 | Aannua00564S108710-RT-RP | qPCR | AATAGCCTTGTCTAATGGAGGGAGT |  |
| 37 | Aannua00178S042380-RT-FP | qPCR | TACTGAATGGGGTAACAGGGAAG   |  |
| 38 | Aannua00178S042380-RT-RP | qPCR | ATTGAACCAGAAAATGGACGGCT   |  |
| 39 | AabZIP1-RT-FP            | qPCR | CGATGTTTCCGAAGCCGTAT      |  |
| 40 | AabZIP1-RT-RP            | qPCR | TGCTAACCCGTCCGATGA        |  |
| 41 | AaABF3-RT-FP             | qPCR | GCTGCTTTCAACTTCAACACTTC   |  |
| 42 | AaABF3-RT-RP             | qPCR | ATAAATCACGTTGAGCCATGCT    |  |
